## CORRECTION

# CORRECTION: Surviving murine experimental sepsis affects the function and morphology of the inner ear

**Natalie Fischer, Nina Maria Mathonia, Georges Hollerich, Julian Vesper, Leyla Pinggera, Daniel Dejaco, Rudolf Glueckert, Anneliese Schrott-Fischer, Peter Lackner, Herbert Riechelmann and Joachim Schmutzhard**

There was an error published in *Biology Open* 6, 732-740; doi: 10.1242/bio.024588

These errors are detailed below and the original article has been changed correspondingly.

The name of the co-author, Georges Hoellerich, was spelt incorrectly and has been changed to Georges Hollerich.
